# Supplementary material for: Within-Range Translocations and Their Consequences in European Larch
Source: PLoS One. 2015 May 22;10(5):e0127516. doi: 10.1371/journal.pone.0127516 (PMC4441476; doi:10.1371/journal.pone.0127516)
Supplement: S4 Fig — (XLSX) [file pone.0127516.s004.xlsx]

## Sheet: Structure_with and without adm
S4 Fig. Individual bar plots of Structure model with and without admixture. Each bar represents an individual. Individuals are ordered in populations from west to east.
Admixture model																	Model without admixture
																K = 2
																K = 3
																K = 4
																K = 5
																K = 6
																K = 7
